# Supplementary material for: Angioplasty of Flow‐Limiting Stenosis Reduces Aortic and Brachial Blood Pressure in Patients With Peripheral Artery Disease
Source: PubMed Central journal article supplement — J Am Heart Assoc. 2021 Jul 6;10(14):e019724. doi: 10.1161/JAHA.120.019724 (PMC8483469; doi:10.1161/jaha.120.019724), 2021-07-06
Supplement: JAH3-10-e019724-s001.pdf [file JAH3-10-e019724-s001.pdf]

# **Supplemental Material**

**Table S1. Adverse events of the index cohort.**

| <b>Adverse events</b>       | <b>All (30)</b> | <b>Iliac (15)</b> | <b>Fempop. (10)</b> | <b>Diagnostic (5)</b> |
|-----------------------------|-----------------|-------------------|---------------------|-----------------------|
| Peripheral embolization (%) | 0 (0)           | 0 (0)             | 0 (0)               | 0 (0)                 |
| Hematoma (%)                | 2 (7)           | 1 (7)             | 1 (10)              | 0 (0)                 |
| Pseudaneurysm (%)           | 0 (0)           | 0 (0)             | 0 (0)               | 0 (0)                 |
| Other (%)                   | 0 (0)           | 0 (0)             | 0 (0)               | 0 (0)                 |
| Death (%)                   | 0 (0)           | 0 (0)             | 0 (0)               | 0 (0)                 |
| Study limb amputation (%)   | 0 (0)           | 0 (0)             | 0 (0)               | 0 (0)                 |
| Severe adverse events (%)   | 0 (0)           | 0 (0)             | 0 (0)               | 0 (0)                 |
| <b>MALE</b>                 |                 |                   |                     |                       |
| Lower extremity bypass (%)  | 0 (0)           | 0 (0)             | 0 (0)               | 0 (0)                 |
| Amputation (%)              | 0 (0)           | 0 (0)             | 0 (0)               | 0 (0)                 |

MALE = major adverse limb events; Fempop. = femoropopliteal; BTK = below the knee

**Table S2. Overview of intraprocedural endpoints in the index cohort.** Segmental, serial, invasive aortic blood pressure (aBP) measurements and brachial blood pressure (bBP) measurements before and after endovascular treatment. Mean systolic aBP (A), mean diastolic aBP (B) as measured at baseline before iliac (n=15) or femoropopliteal angioplasty (n=10) or mere diagnostic angiography (n=5). Changes in systolic bBP (C), diastolic bBP (D) and heart rate (E, HR) at baseline before and after angiography or angioplasty measured in the catheter laboratory.

| A                      | systolic aBP baseline |    | systolic aBP post |    | Paired difference (post-baseline) |         |  | p (t-test) |
|------------------------|-----------------------|----|-------------------|----|-----------------------------------|---------|--|------------|
|                        | mean                  | SE | mean              | SE | mean                              | 95% CI  |  |            |
| Iliac angioplasty      | 173                   | 4  | 149               | 4  | -24                               | -27 -21 |  | <0.0001    |
| Femoropop. angioplasty | 164                   | 5  | 153               | 5  | -11                               | -14 -8  |  | <0.0001    |
| Diagnostic angiography | 157                   | 4  | 158               | 5  | 1                                 | -1 3    |  | 0.22       |

  

| B                      | diastolic aBP baseline |    | diastolic aBP post |    | Paired difference (post-baseline) |        |  | p (t-test) |
|------------------------|------------------------|----|--------------------|----|-----------------------------------|--------|--|------------|
|                        | mean                   | SE | mean               | SE | mean                              | 95% CI |  |            |
| Iliac angioplasty      | 74                     | 1  | 66                 | 1  | -8                                | -9 -6  |  | <0.0001    |
| Femoropop. angioplasty | 76                     | 2  | 72                 | 2  | -4                                | -6 -3  |  | <0.0001    |
| Diagnostic angiography | 70                     | 2  | 71                 | 2  | 1                                 | 0 2    |  | 0.6        |

  

| C                      | systolic bBP baseline |    | systolic bBP post |    | Paired difference (post-baseline) |         |  | p (t-test) |
|------------------------|-----------------------|----|-------------------|----|-----------------------------------|---------|--|------------|
|                        | mean                  | SE | mean              | SE | mean                              | 95% CI  |  |            |
| Iliac angioplasty      | 177                   | 5  | 156               | 5  | -21                               | -25 -17 |  | <0.0001    |
| Femoropop. angioplasty | 166                   | 8  | 156               | 8  | -10                               | -13 -6  |  | <0.0001    |
| Diagnostic angiography | 155                   | 8  | 156               | 8  | 1                                 | -2 4    |  | 0.5        |

  

| D                      | diastolic bBP baseline |    | diastolic bBP post |    | Paired difference (post-baseline) |        |  | p (t-test) |
|------------------------|------------------------|----|--------------------|----|-----------------------------------|--------|--|------------|
|                        | mean                   | SE | mean               | SE | mean                              | 95% CI |  |            |
| Iliac angioplasty      | 72                     | 2  | 66                 | 3  | -6                                | -9 -3  |  | 0.0001     |
| Femoropop. angioplasty | 74                     | 4  | 70                 | 3  | -4                                | -7 -1  |  | 0.02       |
| Diagnostic angiography | 69                     | 4  | 69                 | 4  | 0                                 | -5 6   |  | 0.8        |

  

| E                      | HR baseline |    | HR post |    | Paired difference (post-baseline) |        |  | p (t-test) |
|------------------------|-------------|----|---------|----|-----------------------------------|--------|--|------------|
|                        | mean        | SE | mean    | SE | mean                              | 95% CI |  |            |
| Iliac angioplasty      | 75          | 3  | 76      | 2  | 1                                 | -0.5 4 |  | 0.13       |
| Femoropop. angioplasty | 77          | 4  | 76      | 4  | -1                                | -2 2   |  | 0.9        |
| Diagnostic angiography | 70          | 4  | 70      | 3  | 0                                 | -4 5   |  | 0.8        |

**Table S3.** Aortic (aBP) and brachial blood pressure (bBP) lowering effect of iliac (n=15) and femoral angioplasty (n=10) in the index cohort as compared to diagnostic angiography (n=5).

| <b>A</b>                                     | systolic aBP    |        |     |                            |
|----------------------------------------------|-----------------|--------|-----|----------------------------|
|                                              | mean difference | 95% CI |     | p-value<br>(one-way ANOVA) |
| Iliac angioplasty vs diagnostic angiography  | -25             | -30    | -20 | <0.0001                    |
| Femop. angioplasty vs diagnostic angiography | -12             | -17    | -5  | <0.0001                    |

  

| <b>B</b>                                     | diastolic aBP   |        |    |                            |
|----------------------------------------------|-----------------|--------|----|----------------------------|
|                                              | mean difference | 95% CI |    | p-value<br>(one-way ANOVA) |
| Iliac angioplasty vs diagnostic angiography  | -9              | -13    | -1 | 0.01                       |
| Femop. angioplasty vs diagnostic angiography | -5              | -10    | 2  | 0.2                        |

  

| <b>C</b>                                     | systolic bBP    |        |     |                            |
|----------------------------------------------|-----------------|--------|-----|----------------------------|
|                                              | mean difference | 95% CI |     | p-value<br>(one-way ANOVA) |
| Iliac angioplasty vs diagnostic angiography  | -22             | -30    | -14 | <0.0001                    |
| Femop. angioplasty vs diagnostic angiography | -11             | -19    | -2  | 0.01                       |

  

| <b>D</b>                                     | diastolic bBP   |        |    |                            |
|----------------------------------------------|-----------------|--------|----|----------------------------|
|                                              | mean difference | 95% CI |    | p-value<br>(one-way ANOVA) |
| Iliac angioplasty vs diagnostic angiography  | -6              | -13    | -1 | 0.02                       |
| Femop. angioplasty vs diagnostic angiography | -4              | -11    | 2  | 0.2                        |

**Table S4. Physicomechanical endpoints in the index cohort.** (A) Aortic pulse wave velocity at baseline and after peripheral angioplasty of iliac (n=15) and femoropopliteal (n=10) arteries, as well as mere diagnostic angiography (n=5). (B) Timing of the arrival of the reflected wave (T1) to the aorta, (C) change in Alx before and after endovascular treatment or diagnostic angiography.

| <b>A</b>               | PWV baseline (m/s) |     | PWV post (m/s) |     | Paired difference (post-baseline) |        |     | p (t-test) |
|------------------------|--------------------|-----|----------------|-----|-----------------------------------|--------|-----|------------|
|                        | mean               | SE  | mean           | SE  | mean                              | 95% CI |     |            |
| Iliac angioplasty      | 15.4               | 0.5 | 15.2           | 0.5 | -0.3                              | -0.4   | 0.1 | 0.07       |
| Fempop. angioplasty    | 14.3               | 0.7 | 14             | 0.7 | -0.3                              | -0.7   | 0.3 | 0.5        |
| Diagnostic angiography | 14.4               | 1   | 14.4           | 0.8 | 0                                 | -1     | 1   | 0.96       |

  

| <b>B</b>               | T1 baseline (ms) |    | T1 post (ms) |    | Paired difference (post-baseline) |        |   | p (t-test) |
|------------------------|------------------|----|--------------|----|-----------------------------------|--------|---|------------|
|                        | mean             | SE | mean         | SE | mean                              | 95% CI |   |            |
| Iliac angioplasty      | 103              | 4  | 105          | 3  | -2                                | -1     | 5 | 0.1        |
| Fempop. angioplasty    | 106              | 4  | 107          | 4  | -1                                | -2     | 4 | 0.4        |
| Diagnostic angiography | 106              | 2  | 106          | 2  | 0                                 | -5     | 6 | 0.8        |

  

| <b>C</b>               | Alx baseline (%) |     | Alx post (%) |     | Paired difference (post-baseline) |        |      | p (t-test) |
|------------------------|------------------|-----|--------------|-----|-----------------------------------|--------|------|------------|
|                        | mean             | SE  | mean         | SE  | mean                              | 95% CI |      |            |
| Iliac angioplasty      | 27               | 2.8 | 15           | 2.2 | -12                               | -13.9  | -9.6 | <0.0001    |
| Fempop. angioplasty    | 19               | 2.5 | 14           | 2   | -5                                | -7.4   | -2.5 | 0.0013     |
| Diagnostic angiography | 18               | 3.4 | 18           | 3.2 | 0                                 | -0.6   | 1    | 0.6        |

**Table S5. Office measurements in the index cohort.** Changes in systolic brachial blood pressure (systolic bBP, A) and diastolic brachial blood pressure (diastolic bBP, B), common femoral artery (CFA) blood flow of the target (C) and contralateral leg (D), heart rate (HR, E) and CFA resistance of the target (F) and contralateral leg (G) at baseline one day before and one day after angiography or angioplasty.

| A                      | systolic bBP baseline |    | systolic bBP post |    | Paired difference (post-baseline) |         |  | p (t-test) |
|------------------------|-----------------------|----|-------------------|----|-----------------------------------|---------|--|------------|
|                        | mean                  | SE | mean              | SE | mean                              | 95% CI  |  |            |
| Iliac angioplasty      | 174                   | 4  | 154               | 5  | -20                               | -25 -16 |  | <0.0001    |
| Femoropop. angioplasty | 163                   | 7  | 153               | 7  | -10                               | -13 -7  |  | <0.0001    |
| Diagnostic angiography | 156                   | 9  | 157               | 9  | 1                                 | -3 5    |  | 0.47       |

  

| B                      | diastolic bBP baseline |    | diastolic bBP post |    | Paired difference (post-baseline) |        |  | p (t-test) |
|------------------------|------------------------|----|--------------------|----|-----------------------------------|--------|--|------------|
|                        | mean                   | SE | mean               | SE | mean                              | 95% CI |  |            |
| Iliac angioplasty      | 71                     | 2  | 65                 | 2  | -6                                | -9 -4  |  | <0.0001    |
| Femoropop. angioplasty | 74                     | 4  | 70                 | 4  | -4                                | -7 -1  |  | 0.01       |
| Diagnostic angiography | 70                     | 3  | 71                 | 4  | 0                                 | -4 5   |  | 0.8        |

  

| C                      | CFA flow (ml/min) target leg baseline |    | CFA flow (ml/min) target leg post |    | Paired difference (post-baseline) |        |  | p (t-test) |
|------------------------|---------------------------------------|----|-----------------------------------|----|-----------------------------------|--------|--|------------|
|                        | mean                                  | SE | mean                              | SE | mean                              | 95% CI |  |            |
| Iliac angioplasty      | 210                                   | 39 | 348                               | 38 | 138                               | 96 180 |  | <0.0001    |
| Femoropop. angioplasty | 314                                   | 37 | 377                               | 36 | 63                                | 50 75  |  | <0.0001    |
| Diagnostic angiography | 301                                   | 22 | 306                               | 29 | 5                                 | -17 26 |  | 0.6        |

  

| D                      | CFA flow (ml/min) contralat. leg baseline |    | CFA flow (ml/min) contralat. leg post |    | Paired difference (post-baseline) |        |  | p (t-test) |
|------------------------|-------------------------------------------|----|---------------------------------------|----|-----------------------------------|--------|--|------------|
|                        | mean                                      | SE | mean                                  | SE | mean                              | 95% CI |  |            |
| Iliac angioplasty      | 330                                       | 31 | 327                                   | 30 | -3                                | -17 10 |  | 0.6        |
| Femoropop. angioplasty | 360                                       | 45 | 357                                   | 42 | -3                                | -27 21 |  | 0.8        |
| Diagnostic angiography | 347                                       | 38 | 349                                   | 35 | 2                                 | -18 20 |  | 0.8        |

  

| E                      | HR baseline |    | HR post |    | Paired difference (post-baseline) |        |  | p (t-test) |
|------------------------|-------------|----|---------|----|-----------------------------------|--------|--|------------|
|                        | mean        | SE | mean    | SE | mean                              | 95% CI |  |            |
| Iliac angioplasty      | 77          | 3  | 76      | 3  | -1                                | -3 6   |  | 0.6        |
| Femoropop. angioplasty | 78          | 4  | 76      | 4  | -2                                | -5 1   |  | 0.08       |
| Diagnostic angiography | 71          | 2  | 69      | 2  | -2                                | -6 2   |  | 0.2        |

  

| F                      | Resistance CFA (mmHg*min/l) target leg baseline |     | Resistance CFA (mmHg*min/l) target leg post |    | Paired difference (post-baseline) |           |  | p (t-test) |
|------------------------|-------------------------------------------------|-----|---------------------------------------------|----|-----------------------------------|-----------|--|------------|
|                        | mean                                            | SE  | mean                                        | SE | mean                              | 95% CI    |  |            |
| Iliac angioplasty      | 804                                             | 140 | 326                                         | 40 | -478                              | -712 -244 |  | 0.0007     |
| Femoropop. angioplasty | 379                                             | 51  | 287                                         | 33 | -92                               | -134 -50  |  | 0.0008     |
| Diagnostic angiography | 332                                             | 36  | 335                                         | 46 | 3                                 | -37 43    |  | 0.85       |

  

| G                      | Resistance CFA (mmHg*min/l) contralateral leg baseline |    | Resistance CFA (mmHg*min/l) contralateral leg post |    | Paired difference (post-baseline) |         |  | p (t-test) |
|------------------------|--------------------------------------------------------|----|----------------------------------------------------|----|-----------------------------------|---------|--|------------|
|                        | mean                                                   | SE | mean                                               | SE | Mean                              | 95% CI  |  |            |
| Iliac angioplasty      | 405                                                    | 40 | 380                                                | 37 | -24                               | -38 -10 |  | 0.0022     |
| Femoropop. angioplasty | 335                                                    | 46 | 319                                                | 49 | -16                               | -41 10  |  | 0.19       |
| Diagnostic angiography | 295                                                    | 35 | 294                                                | 35 | -1                                | -17 15  |  | 0.84       |

**Table S6.** Adverse events of the all-comers registry cohort.

| <b>Adverse events</b>       | <b>All (381)</b> | <b>Iliac (119)</b> | <b>Fempop. (208)</b> | <b>BTK (39)</b> | <b>Diagnostic (15)</b> |
|-----------------------------|------------------|--------------------|----------------------|-----------------|------------------------|
| Peripheral embolization (%) | 9 (2)            | 4 (3)              | 5 (2)                | 0 (0)           | 0 (0)                  |
| Hematoma (%)                | 13 (3)           | 4 (3)              | 7 (3)                | 2 (5)           | 0 (0)                  |
| Pseudaneurysm (%)           | 6 (2)            | 0 (0)              | 5 (2)                | 1 (4)           | 0 (0)                  |
| Other (%)                   | 0 (0)            | 0 (0)              | 0 (0)                | 0 (0)           | 0 (0)                  |
| Death (%)                   | 0 (0)            | 0 (0)              | 0 (0)                | 0 (0)           | 0 (0)                  |
| Study limb amputation (%)   | 0 (0)            | 0 (0)              | 0 (0)                | 0 (0)           | 0 (0)                  |
| Severe adverse events (%)   | 0 (0)            | 0 (0)              | 0 (0)                | 0 (0)           | 0 (0)                  |
| <b>MALE</b>                 |                  |                    |                      |                 |                        |
| Lower extremity bypass (%)  | 0 (0)            | 0 (0)              | 0 (0)                | 0 (0)           | 0 (0)                  |
| Amputation (%)              | 0 (0)            | 0 (0)              | 0 (0)                | 0 (0)           | 0 (0)                  |

MALE = major adverse limb events; Fempop. = femoropopliteal; BTK = below the knee

**Table S7. Baseline clinical, demographic and procedural characteristics of the registry cohort compared to the index cohort.**

| <b>(a) Baseline characteristics</b>   | <b>Iliac registry</b> | <b>Iliac index</b> | <b>P</b> | <b>Fempop. registry</b> | <b>Fempop. index</b> | <b>P</b>    | <b>Diagnostic registry</b> | <b>Diagnostic index</b> | <b>P</b>     |
|---------------------------------------|-----------------------|--------------------|----------|-------------------------|----------------------|-------------|----------------------------|-------------------------|--------------|
| n                                     | 119                   | 15                 | -        | 208                     | 10                   | -           | 15                         | 5                       | -            |
| Age (yrs)                             | 70 ± 8                | 69 ± 10            | 0.66     | 72 ± 8                  | 74 ± 8               | 0.35        | 68 ± 12                    | 68 ± 11                 | 0.99         |
| Male (%)                              | 85 (71)               | 11 (73)            | 0.99     | 160 (77)                | 7 (70)               | 0.7         | 12 (80)                    | 4 (80)                  | 1            |
| Smoker (%)                            | 78 (66)               | 11 (73)            | 0.77     | 114 (55)                | 6 (60)               | 0.34        | 9 (60)                     | 3 (60)                  | 1            |
| Hypertension (%)                      | 106 (89)              | 15 (100)           | 1        | 187 (90)                | 10 (100)             | 1           | 12 (80)                    | 5 (100)                 | 0.54         |
| Hyperlipidemia (%)                    | 100 (84)              | 12 (80)            | 0.71     | 149 (71)                | 7 (70)               | 1           | 12 (80)                    | 4 (80)                  | 1            |
| CAD (%)                               | 81 (68)               | 12 (80)            | 0.55     | 145 (70)                | 8 (80)               | 0.73        | 11 (73)                    | 5 (100)                 | 0.53         |
| Diabetes (%)                          | 40 (34)               | 6 (40)             | 0.77     | 98 (47)                 | 4 (40)               | 0.75        | 6 (40)                     | 1 (20)                  | 0.6          |
| Renal failure (%)                     | 40 (34)               | 6 (40)             | 0.77     | 91 (44)                 | 5 (50)               | 0.75        | 6 (40)                     | 2 (40)                  | 1            |
| ASS (%)                               | 115 (97)              | 15 (100)           | 1        | 190 (91)                | 9 (90)               | 1           | 13 (87)                    | 4 (80)                  | 1            |
| Clopidogrel (%)                       | 102 (86)              | 14 (93)            | 0.7      | 169 (81)                | 9 (90)               | 0.69        | 6 (40)                     | 2 (40)                  | 1            |
| Statin (%)                            | 96 (81)               | 13 (87)            | 0.74     | 150 (72)                | 9 (90)               | 0.29        | 10 (67)                    | 4 (80)                  | 1            |
| Antihypertensive treatment (%)        | 108 (90)              | 15 (100)           | 0.6      | 194 (93)                | 10 (100)             | 1           | 15 (100)                   | 5 (100)                 | 1            |
| ACE (%)                               | 70 (59)               | 12 (80)            | 0.11     | 110 (53)                | 9 (90)               | <b>0.02</b> | 8 (53)                     | 4 (80)                  | 0.6          |
| ARB (%)                               | 30 (25)               | 3 (20)             | 0.66     | 55 (26)                 | 1 (10)               | 0.46        | 3 (20)                     | 0 (0)                   | 0.54         |
| CBB (%)                               | 45 (38)               | 6 (40)             | 1        | 71 (34)                 | 3 (30)               | 1           | 5 (33)                     | 1 (20)                  | 1            |
| Betablocker (%)                       | 75 (63)               | 7 (47)             | 0.79     | 132 (64)                | 5 (50)               | 0.5         | 7 (47)                     | 3(60)                   | 1            |
| <b>Clinical stage</b>                 |                       |                    |          |                         |                      |             |                            |                         |              |
| Rutherford 2-3 (%)                    | 96 (81)               | 13 (87)            | 0.74     | 112 (54)                | 6 (60)               | 0.76        | 3 (20)                     | 5 (100)                 | <b>0.036</b> |
| Rutherford 4 (%)                      | 10 (8)                | 0 (0)              | 0.6      | 18 (9)                  | 0 (0)                | 1           | 3 (20)                     | 0 (0)                   | 0.54         |
| Rutherford 5-6 (%)                    | 13 (11)               | 2 (13)             | 0.68     | 78 (37)                 | 4 (40)               | 1           | 9 (60)                     | 0 (0)                   | <b>0.04</b>  |
| <b>Baseline ABI</b>                   | 0.53 ± 0.11           | 0.52 ± 0.11        | 0.7      | 0.5 ± 0.1               | 0.53 ± 0.12          | 0.4         | 0.51 ± 0.07                | 0.53 ± 0.03             | 0.55         |
| <b>(b) Procedural characteristics</b> |                       |                    |          |                         |                      |             |                            |                         |              |
| <b>No. of stents</b>                  |                       |                    |          |                         |                      |             |                            |                         |              |
| 0 (%)                                 | 4 (3)                 | 0 (0)              | 1        | 50 (24)                 | 1 (10)               | 0.45        | 15 (100)                   | 5 (100)                 | 1            |
| 1 (%)                                 | 43 (37)               | 4 (27)             | 0.57     | 80 (38)                 | 7 (70)               | 0.09        | 0 (0)                      | 0 (0)                   | na           |
| 2 (%)                                 | 59 (49)               | 9 (60)             | 0.59     | 57 (27)                 | 1 (10)               | 0.3         | 0 (0)                      | 0 (0)                   | na           |
| >=3 (%)                               | 13 (11)               | 2 (13)             | 0.68     | 21 (10)                 | 1 (10)               | 1           | 0 (0)                      | 0 (0)                   | na           |
| Length of target lesion (mm)          | 42.0 ± 6              | 44.0 ± 7           | 0.23     | 158.0 ± 51              | 165.0 ± 67           | 0.68        | 210 ± 78                   | 180 ± 80                | 0.47         |
| Length of stented segment (mm)        | 44.0 ± 5              | 46.0 ± 9           | 0.2      | 164.0 ± 60              | 172.0 ± 71           | 0.7         | 0 (0)                      | 0 (0)                   | na           |
| Target vessel diameter (mm)           | 8.1 ± 0.6             | 8.4 ± 0.7          | 0.08     | 6.2 ± 0.6               | 6.0 ± 0.9            | 0.3         | 6.9 ± 12                   | 6.6 ± 1                 | 0.62         |
| Occlusion (%)                         | 62 (52)               | 6 (40)             | 0.38     | 142 (68)                | 7 (70)               | 1           | 13 (87)                    | 3 (60)                  | 0.2          |
| <b>ABI before discharge</b>           | 0.92 ± 0.1            | 0.92 ± 0.07        | 0.99     | 0.92 ± 0.12             | 0.92 ± 0.07          | 0.99        | 0.54 ± 0.11                | 0.54 ± 0.03             | 0.99         |

ABI = ankle-brachial index of the target leg, ACE = angiotensin-converting-enzyme inhibitor, ARB = angiotensin receptor blocker, BTK = below the knee, CAD = coronary artery disease, CBB = calcium channel blocker, Fempop. = femoropopliteal. Categorical variables are presented as absolute numbers (n) and percentages (%); statistical comparisons for these were made by the chi-squared test. Continuous variables are expressed as mean values and standard deviation and compared by unpaired t-test. The values presented in the column “p-value” represent the overall difference between two groups; bold font indicates a significant difference between groups (p<0.05)



**Table S8.** Overview of end points in the registry cohort. Systolic brachial blood pressure (A, systolic bBP) and diastolic brachial blood pressure (B, diastolic bBP) at baseline as measured on the day before and post on the day after mere diagnostic angiography of peripheral arteries (n=15) or elective angioplasty of iliac (n=119), femoropopliteal (n=208), and below-the-knee (BTK, n=39) arteries.

| <b>A</b>               | systolic bBP baseline |    | systolic bBP post |    | Paired difference (post-baseline) |         |            |
|------------------------|-----------------------|----|-------------------|----|-----------------------------------|---------|------------|
|                        | mean                  | SE | mean              | SE | mean                              | 95% CI  | p (t-test) |
| Iliac angioplasty      | 152                   | 2  | 133               | 2  | -19                               | -15 -23 | <0.001     |
| Femropop. angioplasty  | 154                   | 2  | 143               | 1  | -12                               | -9 -15  | <0.001     |
| BTK angioplasty        | 143                   | 3  | 136               | 3  | -7                                | -1 -14  | 0.032      |
| Diagnostic angiography | 149                   | 3  | 147               | 4  | -2                                | 2 -6    | 0.271      |

  

| <b>B</b>               | diastolic bBP baseline |    | diastolic bBP post |    | Paired difference (post-baseline) |        |            |
|------------------------|------------------------|----|--------------------|----|-----------------------------------|--------|------------|
|                        | mean                   | SE | Mean               | SE | mean                              | 95% CI | p (t-test) |
| Iliac angioplasty      | 77                     | 2  | 72                 | 2  | -5                                | -2 -9  | 0.006      |
| Femoropop. angioplasty | 77                     | 1  | 73                 | 1  | -4                                | -1 -6  | 0.002      |
| BTK angioplasty        | 77                     | 3  | 77                 | 3  | -1                                | 6 -8   | 0.849      |
| Diagnostic angiography | 78                     | 2  | 83                 | 9  | 5                                 | 21 -11 | 0.460      |

**Table S9.** Change in brachial blood pressure (bBP) following angioplasty in the registry cohort. Delta office systolic bBP (A) and diastolic bBP (B) after elective angioplasty of iliac (n=119), femoropopliteal (n=208), below-the-knee (BTK, n=39) arteries as compared to delta bBP after diagnostic angiography (n=15).

| A                                             | systolic bBP    |        |    |                            |
|-----------------------------------------------|-----------------|--------|----|----------------------------|
|                                               | mean difference | 95% CI |    | p-value<br>(one-way ANOVA) |
| Iliac angioplasty vs diagnostic angiography   | -17             | -31    | -8 | 0.0005                     |
| Fempop. angioplasty vs diagnostic angiography | -10             | -23    | -1 | 0.04                       |
| BTK vs diagnostic angiography                 | -5              | -5     | 19 | 0.34                       |

  

| B                                             | diastolic bBP   |        |      |                            |
|-----------------------------------------------|-----------------|--------|------|----------------------------|
|                                               | mean difference | 95% CI |      | p-value<br>(one-way ANOVA) |
| Iliac angioplasty vs diagnostic angiography   | -10             | -17    | -2   | 0.01                       |
| Fempop. angioplasty vs diagnostic angiography | -9              | -15    | -0.3 | 0.04                       |
| BTK vs diagnostic angiography                 | -6              | -14    | 4    | 0.33                       |

**Table S10.** Factors associated with change of systolic brachial blood pressure (bBP). Multiple linear regression analysis was performed with comorbidities (age, BMI, CKD, sex, CAD, hypercholesterolemia, smoking, diabetes, hypertension, COPD), hemodynamic characteristics (Alx, PWV, bBP) and localization of the proximal stenosis (iliac vs. femoropopliteal vs. BTK vs diagnostic angiography) as covariates.

| Univariate analysis          | Index cohort (n=30)                                 | Registry cohort (n=381)                             | All patients (n=411)                                |
|------------------------------|-----------------------------------------------------|-----------------------------------------------------|-----------------------------------------------------|
| Baseline systolic bBP        | r=-0.35; R <sup>2</sup> =0.12; p=0.06               | r=-0.51; R <sup>2</sup> =0.24; <b>p&lt;0.001</b>    | r=-0.50; R <sup>2</sup> =0.25; <b>p&lt;0.001</b>    |
| Baseline diastolic bBP       | r=-0.19; R <sup>2</sup> =0.04; p=0.32               | r=-0.23; R <sup>2</sup> =0.10; <b>p&lt;0.001</b>    | r=-0.21; R <sup>2</sup> =0.05; <b>p&lt;0.001</b>    |
| Baseline Alx                 | r=-0.39; R <sup>2</sup> =0.14; <b>p=0.04</b>        | n/a                                                 | n/a                                                 |
| Baseline PWV                 | r=-0.22; R <sup>2</sup> =0.05; p=0.23               | n/a                                                 | n/a                                                 |
| Segment of angioplasty       |                                                     |                                                     |                                                     |
| 1 = iliac                    | 1: r=-0.73; R <sup>2</sup> =0.53; <b>p&lt;0.001</b> | 1: r=-0.20; R <sup>2</sup> =0.04; <b>p&lt;0.001</b> | 1: r=-0.22; R <sup>2</sup> =0.05; <b>p&lt;0.001</b> |
| 2 = fempop + BTK             | 2: r=0.26; R <sup>2</sup> =0.07; p=0.08             | 2: r=0.14; R <sup>2</sup> =0.02; <b>p=0.004</b>     | 2: r=0.14; R <sup>2</sup> =0.02; <b>p=0.002</b>     |
| <b>Multivariate analysis</b> | <b>Index cohort (n=30)</b>                          | <b>Registry cohort (n=381)</b>                      | <b>All patients (n=411)</b>                         |
|                              | R <sup>2</sup> = 0.78, constant = -16.6             | R <sup>2</sup> = 0.31, constant = 62.3              | R <sup>2</sup> =0.29, constant = 54,76              |
| Baseline systolic bBP        | Beta-Coeff.=0.07; p=0.59                            | Beta-Coeff.=-0.49; <b>p&lt;0.001</b>                | Beta-Coeff.=-0.44; <b>p&lt;0.001</b>                |
| Baseline diastolic bBP       | Beta-Coeff.=-0.16; p=0.21                           | Beta-Coeff.=-0.01; p=0.80                           | Beta-Coeff.=-0.04; p=0.43                           |
| Baseline Alx                 | Beta-Coeff.=0.60; p=0.55                            | n/a                                                 | n/a                                                 |
| Baseline PWV                 | Beta-Coeff.=0.02; p=0.86                            | n/a                                                 | n/a                                                 |
| Segment of angioplasty       |                                                     |                                                     |                                                     |
| 1 = iliac                    | 1: Beta-Coeff.=-1.1; <b>p&lt;0.0001</b>             | 1: Beta-Coeff.=-0.40; <b>p=0.001</b>                | 1: Beta-Coeff.=-0.42; <b>p&lt;0.001</b>             |
| 2 = fempop + BTK             | 2: Beta-Coeff.=-0.47; <b>p=0.003</b>                | 2: Beta-Coeff.=-0.20; p=0.09                        | 2: Beta-Coeff.=-0.24; <b>p=0.03</b>                 |

bBP = brachial blood pressure; Alx = augmentation index; PWV = pulse wave velocity; Fempop. = femoropopliteal; BTK = below the knee;

bold font indicates a significant association with change of systolic bBP (p<0.05).

**Figure S1. Aortic (aBP) and brachial blood pressure (bBP) lowering effect of iliac and femoral angioplasty as compared to diagnostic angiography.**

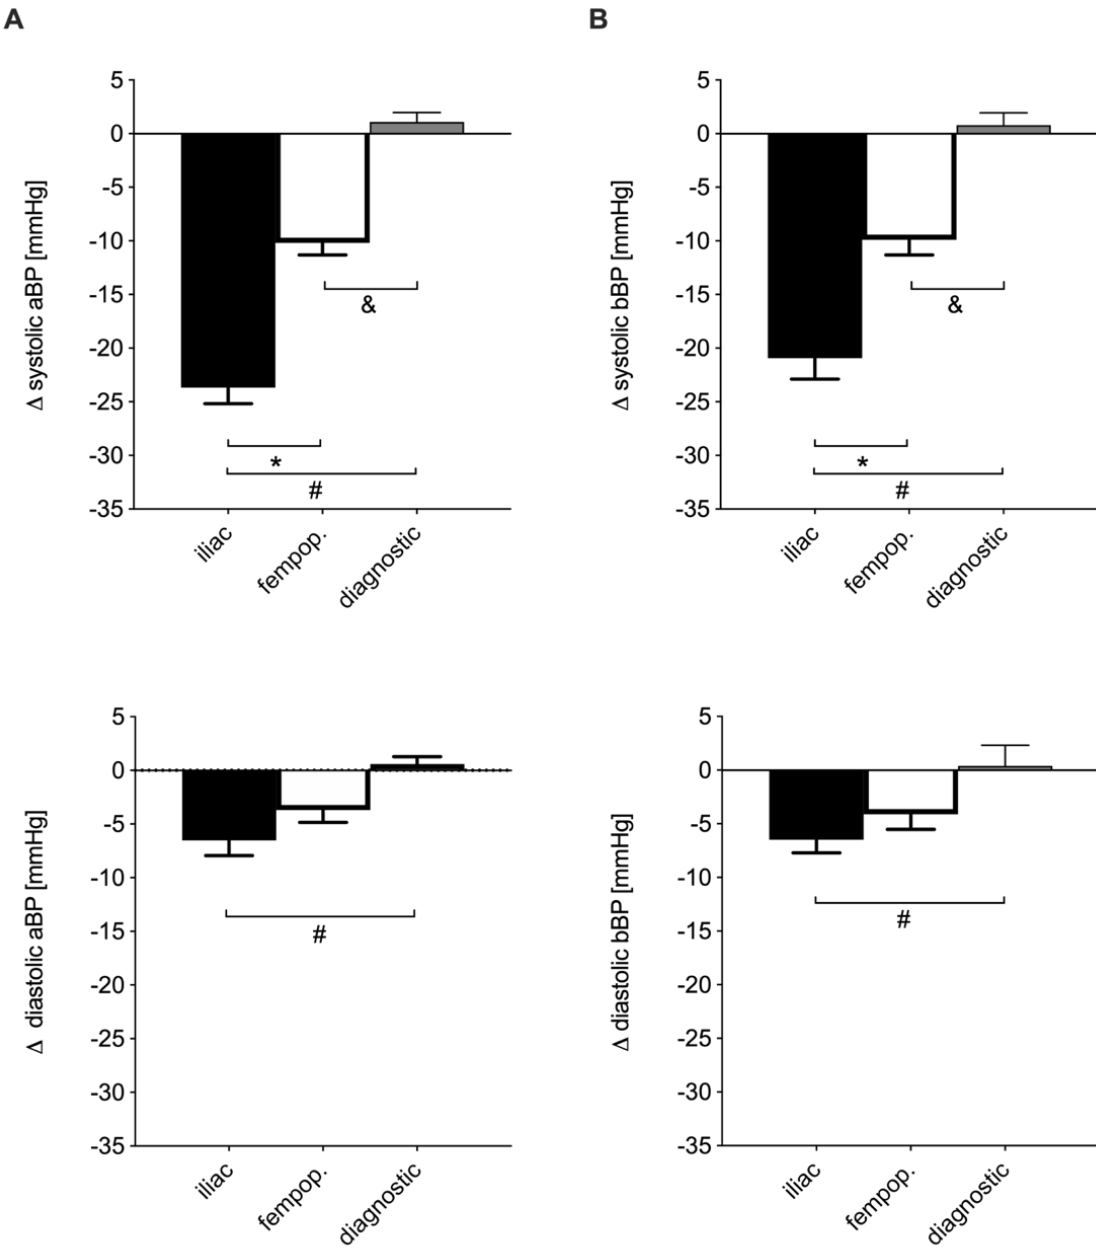

Changes of mean systolic/diastolic aBP (A) and mean systolic/diastolic bBP (B) are given in delta BP, data to calculate changes in BP are derived from Figure 2. Bars indicate mean and standard error of the mean. \*, & and # indicate significant differences at  $p < 0.05$  (one-way ANOVA).
